# Supplementary material for: Novel mutual prodrug of 5-fluorouracil and heme oxygenase-1 inhibitor (5-FU/HO-1 hybrid): design and preliminary in vitro evaluation
Source: PubMed Central journal article supplement (PMC8231349; doi:10.1080/14756366.2021.1928111), 2021-06-24
Supplement: IENZ_A_1928111_SM4399.pdf [file IENZ_A_1928111_SM4399.pdf]

## Supplemental Material

### Novel mutual prodrug of 5-fluorouracil and heme oxygenase 1 inhibitor (5-FU/HO-1 hybrid): design and preliminary *in vitro* evaluation

Loredana Salerno<sup>a</sup>, Luca Vanella<sup>a</sup>, Valeria Sorrenti<sup>a</sup>, Valeria Consoli<sup>a</sup>, Valeria Ciaffaglione<sup>a</sup>, Antonino N. Fallica<sup>a</sup>, Vittorio Canale<sup>b</sup>, Paweł Zajdel<sup>b</sup>, Rosario Pignatello<sup>a</sup>, and Sebastiano Intagliata<sup>a\*</sup>

<sup>a</sup>Department of Drug and Health Sciences, University of Catania, Viale A. Doria 6, 95125 Catania, Italy; <sup>b</sup>Department of Organic Chemistry, Jagiellonian University Medical College, 9 Medyczna Str., 30-688, Kraków, Poland

\*corresponding author: [s.intagliata@unict.it](mailto:s.intagliata@unict.it); Tel.: +39-095-738-4053

#### Table of contents

|                                                                                                                                                              |       |
|--------------------------------------------------------------------------------------------------------------------------------------------------------------|-------|
| <b>Figures S1, S2:</b> <sup>1</sup> H NMR spectra of intermediate <b>2</b> and final compound <b>3</b>                                                       | S2    |
| <b>Figures S3, S4:</b> MS spectra of intermediate <b>2</b> and final compound <b>3</b>                                                                       | S3    |
| <b>Figures S5-S7:</b> HPLC chromatograms of <b>1-3</b>                                                                                                       | S4    |
| <b>Table S1:</b> Percentage of compound remaining ( <b>3</b> ) at different pHs and time intervals                                                           | S5    |
| <b>Figure S8:</b> Hydrolysis rate of <b>3</b> in PBS buffer (pH = 7.4)                                                                                       | S5    |
| <b>Figures S9-S12:</b> representative HPLC chromatograms of the <i>in vitro</i> stability of <b>3</b> in PBS buffer (pH = 7.4) and porcine esterase solution | S5-S6 |
| <b>Table S2:</b> Inhibitory potency of compounds <b>1-3</b> towards HO-1                                                                                     | S7    |

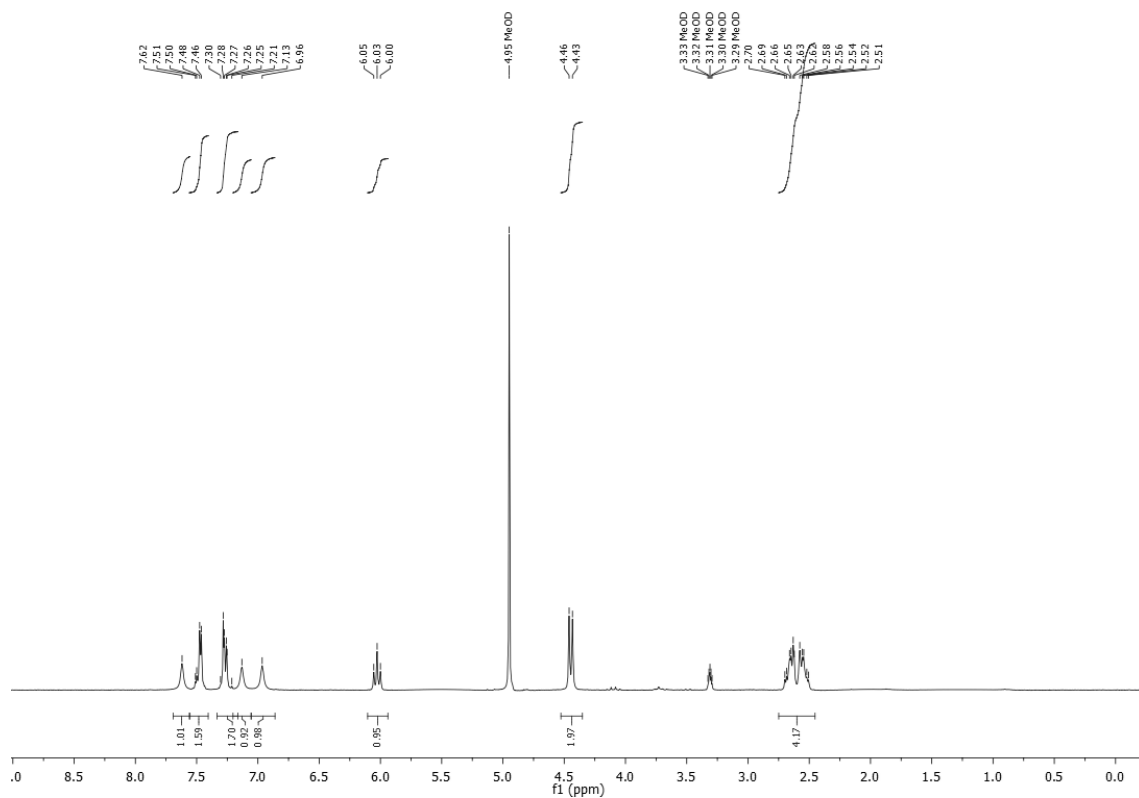

**Figure S1.**  $^1\text{H}$  NMR spectrum of compound **2**

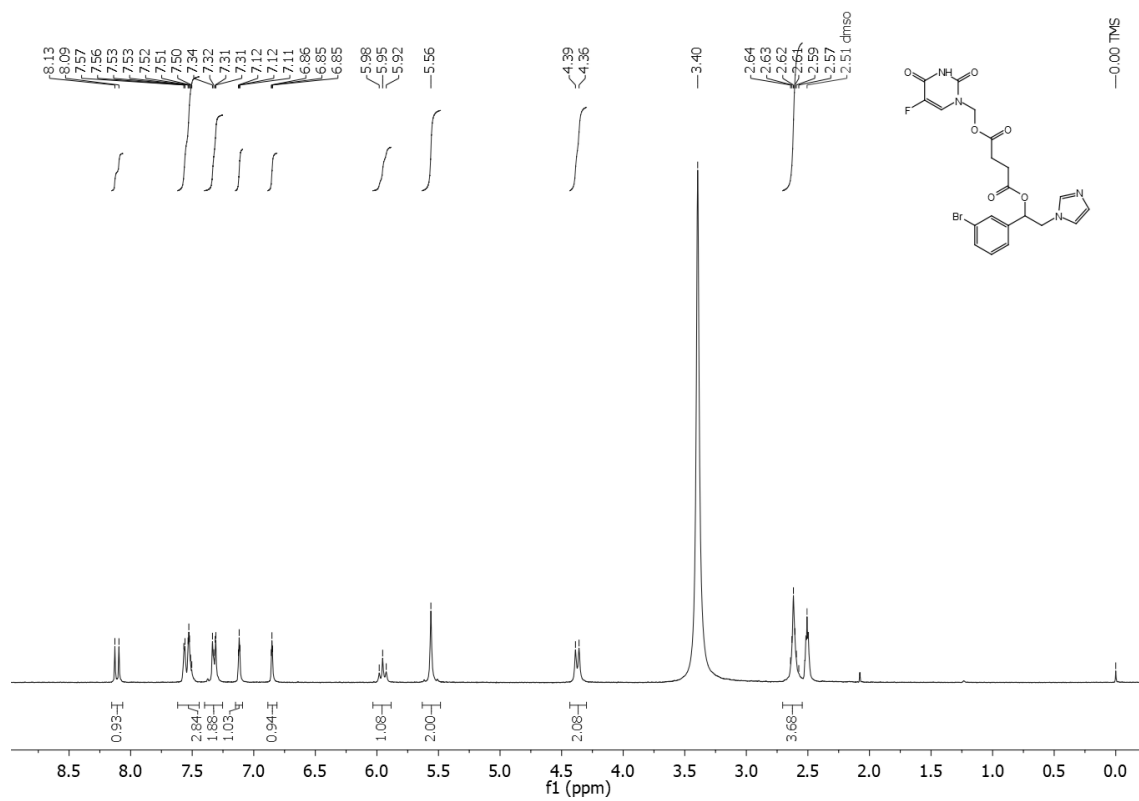

**Figure S2.**  $^1\text{H}$  NMR spectrum of compound **3**

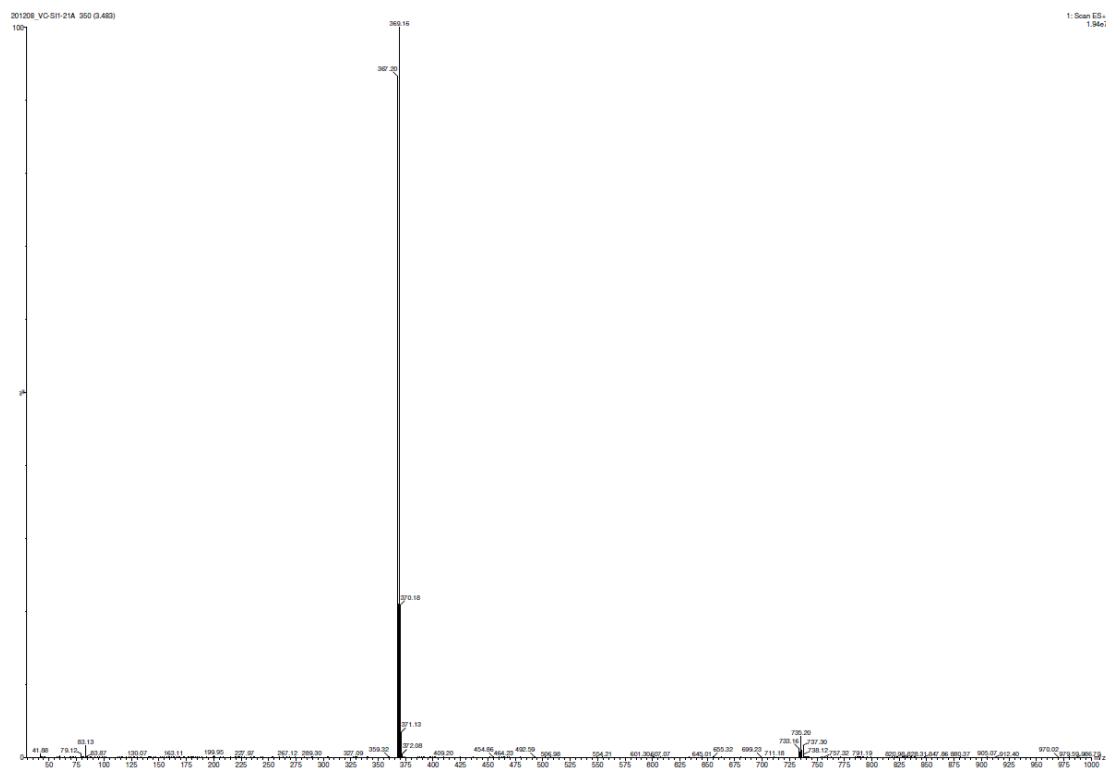

Figure S3. MS spectrum of compound 2

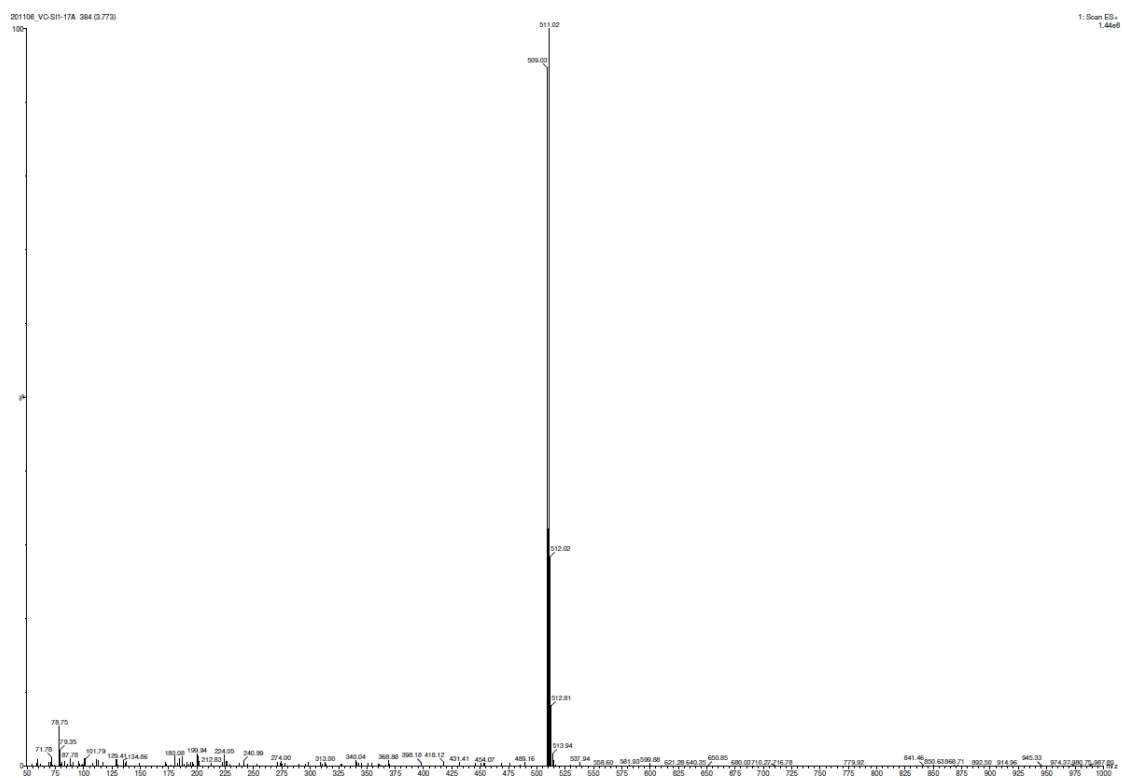

Figure S4. MS spectrum of compound 3

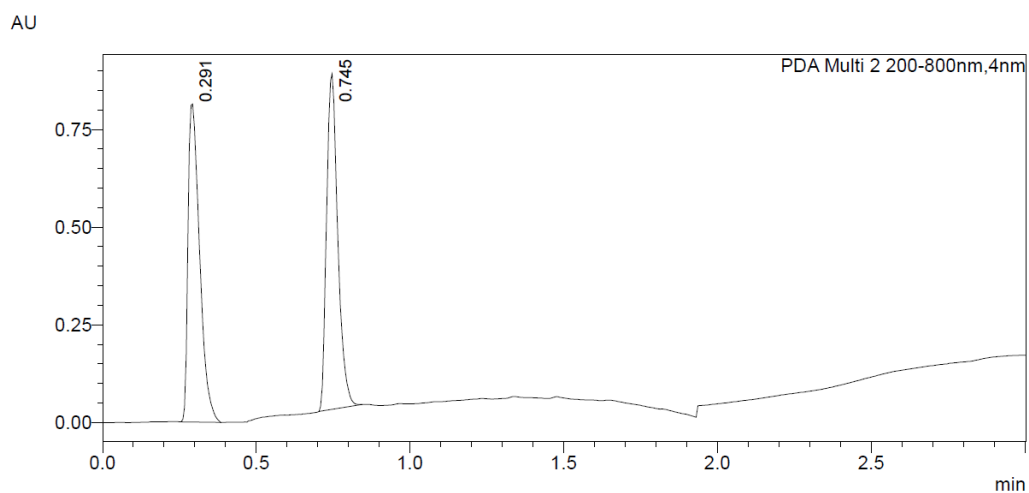

**Figure S5.** HPLC chromatogram of **1** ( $t_R = 0.745$ )

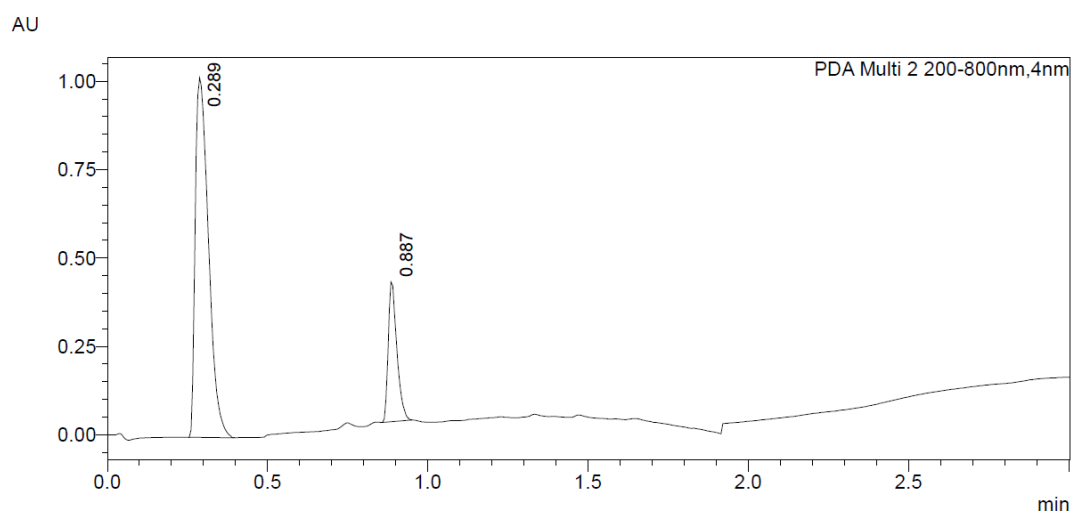

**Figure S6.** HPLC chromatogram of **2** ( $t_R = 0.887$ )

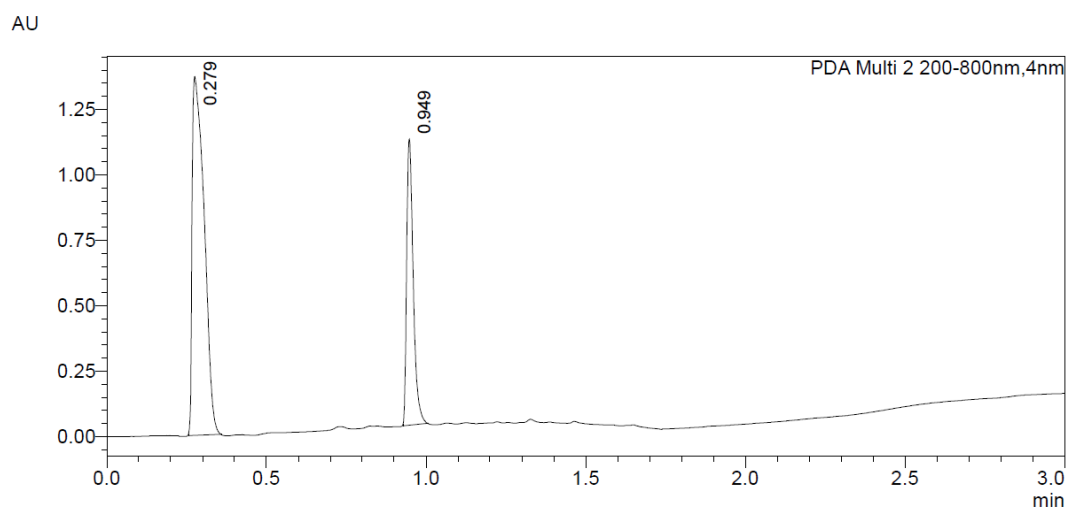

**Figure S7.** HPLC chromatogram of **3** ( $t_R = 0.949$ )

**Table S1.** Percentage of compound remaining (**3**) at different pHs over different time intervals.

| Time (h) | % Compound remaining <sup>1</sup> |            |                   |
|----------|-----------------------------------|------------|-------------------|
|          | pH = 2.0                          | pH = 7.4   | pH = 8.0          |
| 0        | 100 ± 0.0                         | 100 ± 0.0  | 100 ± 0.0         |
| 24       | 94.2 ± 0.9                        | 77.3 ± 3.9 | 50.4 ± 2.4        |
| 48       | 92.2 ± 0.6                        | 71.2 ± 4.5 | 36.1 ± 2.1        |
| 72       | 86.8 ± 6.0                        | 52.6 ± 3.8 | 19.7 ± 1.6        |
| 96       | 77.1 ± 6.5                        | 34.7 ± 2.2 | N.D. <sup>2</sup> |
| 168      | 73.5 ± 4.7                        | 18.0 ± 4.2 | N.D. <sup>2</sup> |

<sup>1</sup> Values represent the mean ± SEM of three independent experiments;

<sup>2</sup> N.D. = not detected

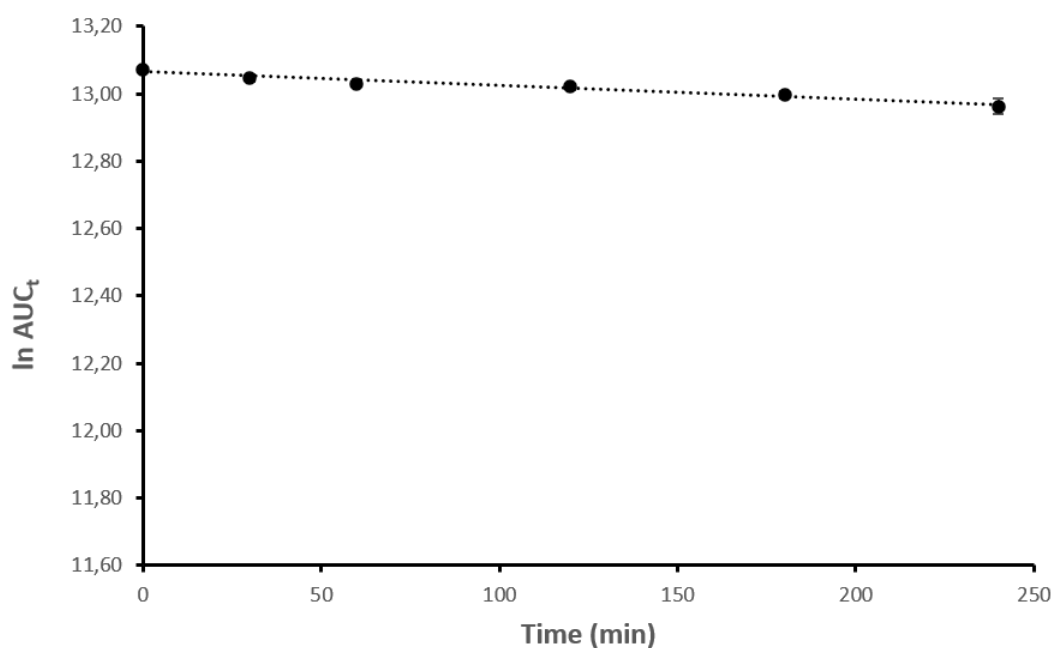

**Figure S8.** Hydrolysis rate of **3** in PBS buffer (pH = 7.4). A linear pseudo first-order plot of the  $\ln AUC_t$  vs. time was observed.  $k = 0.41 \times 10^{-3} \text{ min}^{-1}$ ;  $t_{1/2} = 1689 \text{ min}$ ;  $r = 0.979$ . Data are representative of three independent experiments and values are expressed in mean ± SEM.

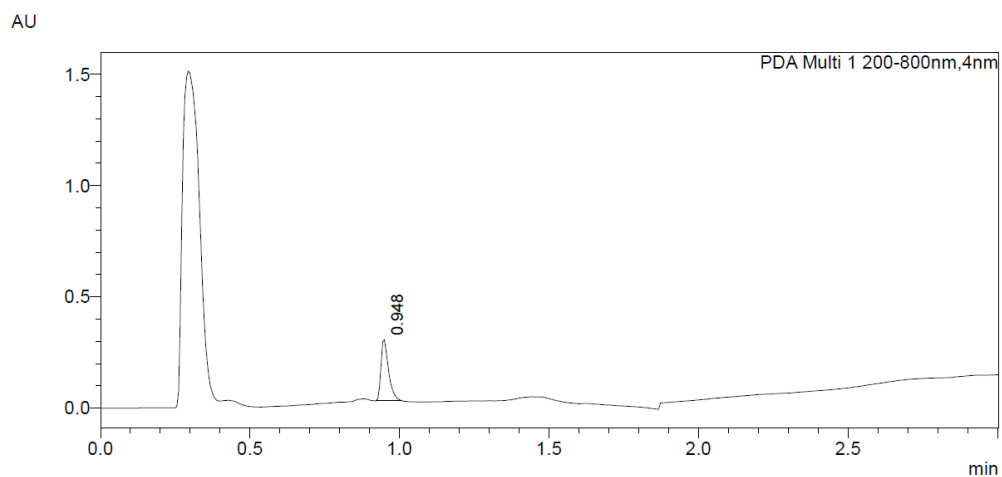

**Figure S9.** HPLC chromatogram of **3** ( $t_R = 0.948$ ) immediately after its incubation in PBS buffer (pH = 7.4)

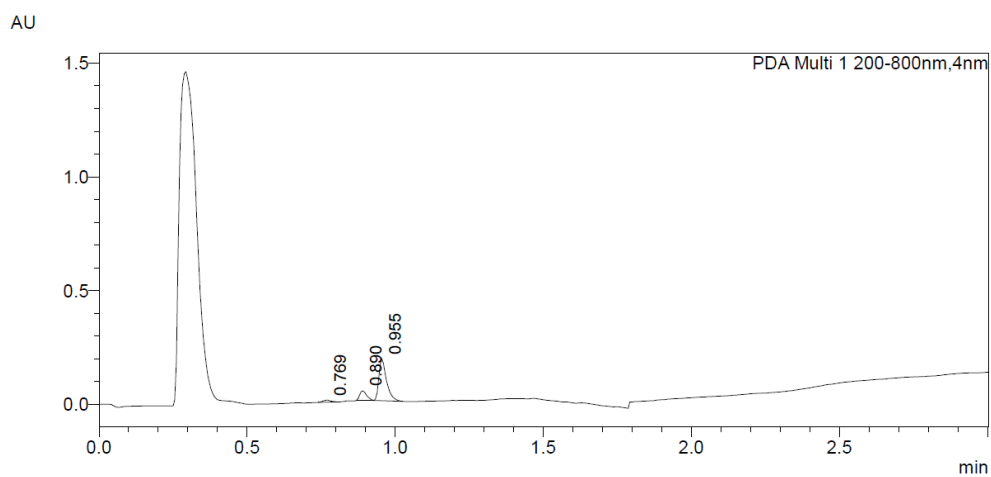

**Figure S10.** HPLC chromatogram of **3** ( $t_R = 0.955$ ) 24 hours after its incubation in PBS buffer (pH = 7.4)

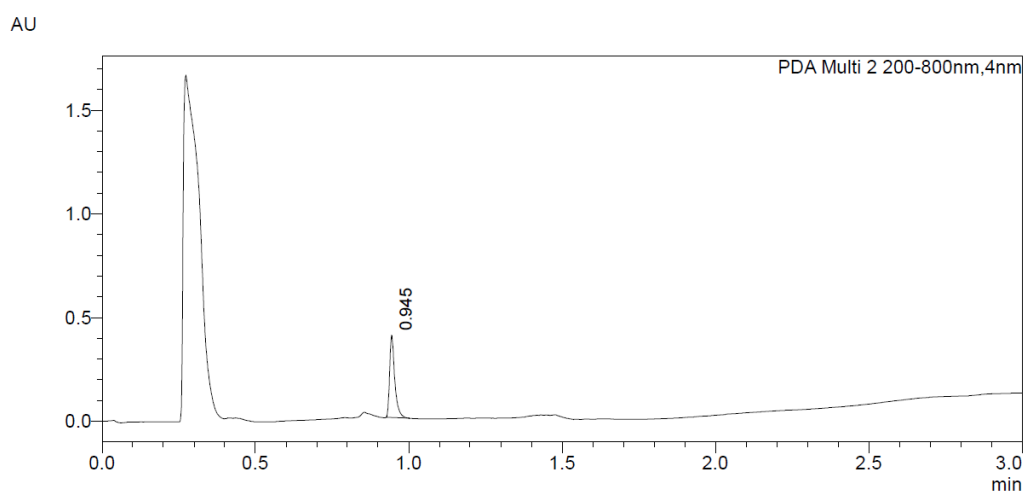

**Figure S11.** HPLC chromatogram of **3** ( $t_R = 0.945$ ) immediately after its incubation in porcine esterase solution

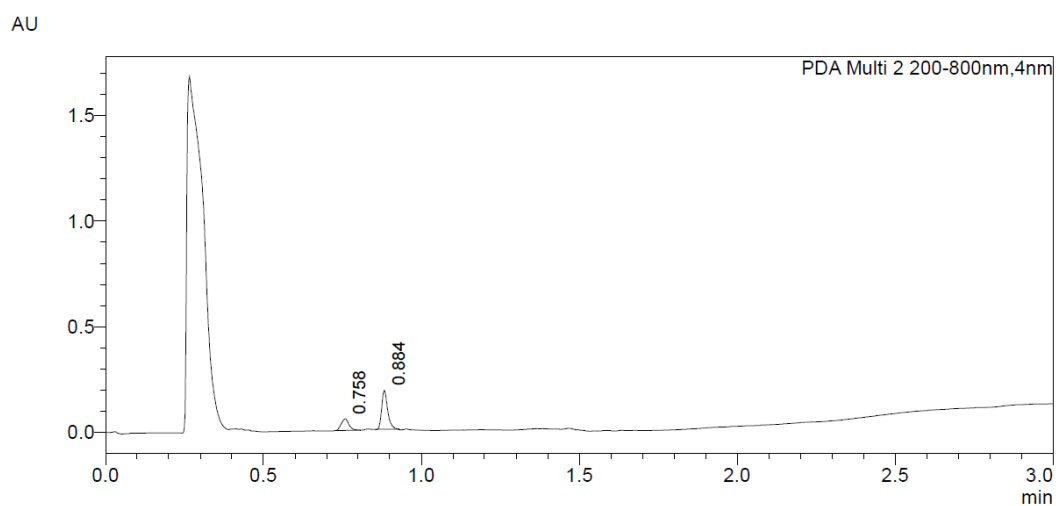

**Figure S12.** HPLC chromatogram of **3** ( $t_R = 0.952$ ) 24 hours after its incubation in porcine esterase solution

**Table S2.** Inhibitory potency of compounds **1–3** towards HO-1.

| Compound              | HO-1 IC <sub>50</sub> (μM) <sup>1</sup> |
|-----------------------|-----------------------------------------|
| <b>1</b> <sup>2</sup> | 0.4 ± 0.01                              |
| <b>2</b>              | 104.6 ± 5.8                             |
| <b>3</b>              | 82 ± 2.1                                |

<sup>1</sup> Values represent the mean ± standard deviation (SD) of triplicate assays;

<sup>2</sup> Data from Greish *et al. Molecules* **2018**, *23*, 1209.
